# Supplementary material for: The impact of a social norms approach on reducing levels of misperceptions around smokefree hospital entrances amongst patients, staff, and visitors of a NHS hospital: a repeated cross-sectional survey study
Source: Springer Nature journal article supplement (doi:10.1186/s12889-018-6231-x), 2018-12-01
Supplement: MOESM1 [file 16332898]

Date:

Time:

**NHS**

**Wakefield District**

# **just your best guess?**

## **Pinderfields Hospital Survey 2012**

**We ask you to find 5-10 minutes to fill in this survey.  
Your answers will make a difference to Pinderfields hospital.  
By completing it you will ensure your views are listened to.**

### **DONATION TO CHARITY**

For every survey completed and returned a donation of £1 will be made to a local charity . Please indicate which charity you would like us to donate to on your behalf:

The Mid Yorkshire Hospitals  
NHS Trust Charitable Fund

Wakefield Hospice

Macmillan Nurses

**Thank You**

# just your best guess?

Pinderfields Hospital Survey 2012

We are collecting this information so we can understand what people think about smoking around the grounds of Pinderfields Hospital.

IT SHOULD TAKE 5-10 MINUTES TO ANSWER THE QUESTIONS.

- Everything you tell us will be treated in confidence
- Please answer each question honestly
- There are no right or wrong answers
- Please do not ask anybody else when you answer the questions. We are interested in your opinion.
- Follow the instructions for each question carefully.
- When you have completed the survey please give it back to the person you gave it to you or put in it inside the envelope provided and hand in to:

Pinderfields General Office

(open Monday to Friday 9am - 5pm).

Outside these times please hand into a member of staff at the reception desk.

Thank you for agreeing to take part in this survey.

*In this questionnaire we will ask about smoking in hospital entrances and hospital grounds.*

By this we mean:

Hospital entrances are any entrances that lead into the hospital building.

Hospital grounds are any area within the boundry of the hospital site, including car parks.

## SECTION 1: About you

1. Are you male or female? Please tick one box  Male  Female

2. How old are you? Please write your age in the box  Years

3. Which of the following best describes the reason for your being at Pinderfields Hospital today?

Please tick  a suitable box.

- I am a hospital in-patient
- I am a hospital out-patient
- I am visiting (or here with) a patient
- I am Pinderfields Hospital staff, please specify below
  - Clinical
  - Domestic
  - Technical
  - Administration/Management
  - Other (please specify) .....
- I am visiting (or here with) Pinderfields Hospital staff
- Other (please specify) .....

4. What is your ethnic group?

We are asking this question so we can understand more about what people from different backgrounds think. Please tick  one box.

I'd prefer not to say

### White

- English / Welsh / Scottish / Northern Irish
- Irish
- Gypsy or Irish Traveller
- Any other White background (please specify) .....

### Mixed/multiple ethnic groups

- White and Black Caribbean
- White and Black African
- White and Asian
- Any other Mixed / multiple ethnic background (please specify) .....

### Asian / Asian British

- Indian
- Pakistani
- Bangladeshi
- Any other Asian background (please specify) .....

### Black / African / Caribbean / Black British

- Caribbean
- African
- Any other Black / African / Caribbean background (please specify) .....

### Other ethnic group

- Any other ethnic group (please specify) .....

## SECTION 2: Your own opinions and behaviour

The following questions ask about what you think **other people** at Pinderfields Hospital **do** in relation to smoking habits in and around the hospital grounds.

Some questions ask about staff, some ask about patients, and some ask about visitors.

If you are unsure what we mean by hospital entrances or grounds please refer to page 2.

### 5. Do you agree or disagree with these statements about smoking in the hospital entrances?

Please tick  one box on each line of this question

|                                                                          | Strongly Agree           | Agree                    | Neither Agree or Disagree | Disagree                 | Strongly Disagree        |
|--------------------------------------------------------------------------|--------------------------|--------------------------|---------------------------|--------------------------|--------------------------|
| <b>HOSPITAL PATIENTS</b> should not smoke in hospital building entrances | <input type="checkbox"/> | <input type="checkbox"/> | <input type="checkbox"/>  | <input type="checkbox"/> | <input type="checkbox"/> |
| <b>HOSPITAL STAFF</b> should not smoke in hospital building entrances    | <input type="checkbox"/> | <input type="checkbox"/> | <input type="checkbox"/>  | <input type="checkbox"/> | <input type="checkbox"/> |
| <b>VISITORS</b> should not smoke in hospital building entrances          | <input type="checkbox"/> | <input type="checkbox"/> | <input type="checkbox"/>  | <input type="checkbox"/> | <input type="checkbox"/> |

### 6. Do you agree or disagree that people should not smoke on hospital grounds?

Please tick  one box on each line of this question

|                                                               | Strongly Agree           | Agree                    | Neither Agree or Disagree | Disagree                 | Strongly Disagree        |
|---------------------------------------------------------------|--------------------------|--------------------------|---------------------------|--------------------------|--------------------------|
| <b>HOSPITAL PATIENTS</b> should not smoke on hospital grounds | <input type="checkbox"/> | <input type="checkbox"/> | <input type="checkbox"/>  | <input type="checkbox"/> | <input type="checkbox"/> |
| <b>HOSPITAL STAFF</b> should not smoke on hospital grounds    | <input type="checkbox"/> | <input type="checkbox"/> | <input type="checkbox"/>  | <input type="checkbox"/> | <input type="checkbox"/> |
| <b>VISITORS</b> should not smoke on hospital grounds          | <input type="checkbox"/> | <input type="checkbox"/> | <input type="checkbox"/>  | <input type="checkbox"/> | <input type="checkbox"/> |

The following question asks about you smoking tobacco (including cigarettes and roll-ups) on Pinderfields Hospital grounds.

### 7. Which of the following **BEST** applies to you? Please tick one box only.

- |                                                                                                                                                 |                                                                                                                                       |
|-------------------------------------------------------------------------------------------------------------------------------------------------|---------------------------------------------------------------------------------------------------------------------------------------|
| <input type="checkbox"/> I am a non-smoker.                                                                                                     | <input type="checkbox"/> I only smoke in the entrances to the hospital building, but <u>would not smoke elsewhere on the grounds.</u> |
| <input type="checkbox"/> I am a smoker but do not smoke <u>anywhere on hospital grounds.</u>                                                    | <input type="checkbox"/> I smoke on hospital grounds, this includes in entrances to the hospital building.                            |
| <input type="checkbox"/> I <u>do not smoke in the entrances</u> to the hospital building, but I <u>do/would smoke elsewhere on the grounds.</u> |                                                                                                                                       |

## SECTION 3: The opinions of others in relation to smoking

These questions ask about **what you believe other people** who come to Pinderfields Hospital **think** in relation to smoking in and around the hospital grounds.

It doesn't matter if you really don't know the answer – it's just your best guess.

### STATEMENT 1 “Pinderfields Hospital entrances should be a place where people don't smoke.”

#### 8. a) How many **HOSPITAL PATIENTS** do you think would agree with this statement?

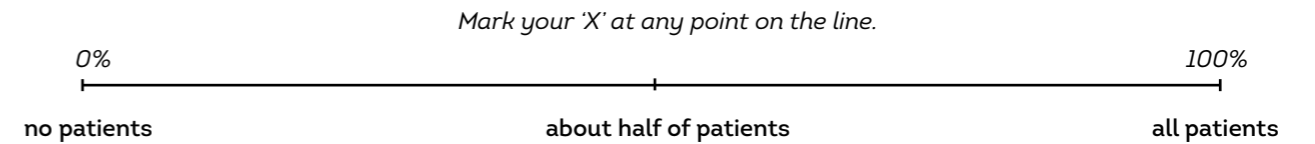

#### b) How many **HOSPITAL STAFF** do you think would agree with this statement?

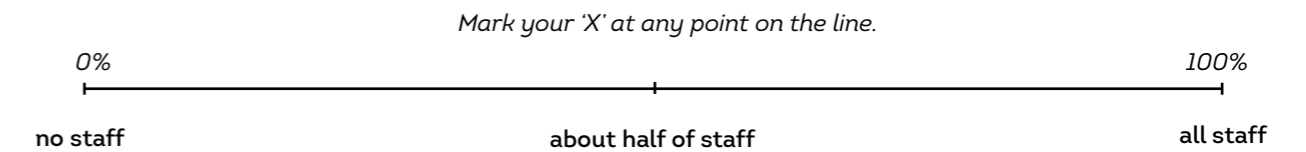

#### c) How many **HOSPITAL VISITORS** do you think would agree with this statement?

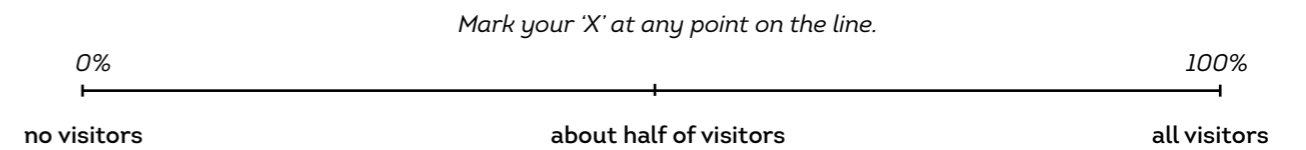

### STATEMENT 2 “Pinderfields Hospital grounds should be a place where people don't smoke.”

#### 9. a) How many **HOSPITAL PATIENTS** do you think would agree with this statement?

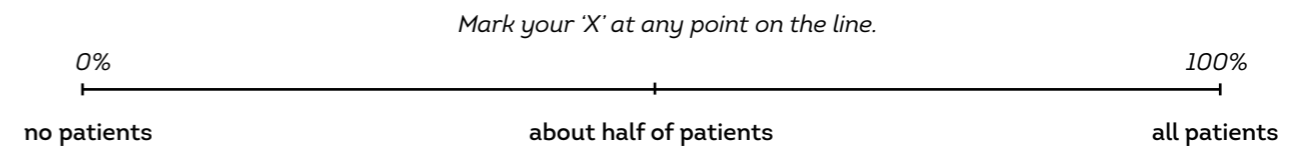

#### b) How many **HOSPITAL STAFF** do you think would agree with this statement?

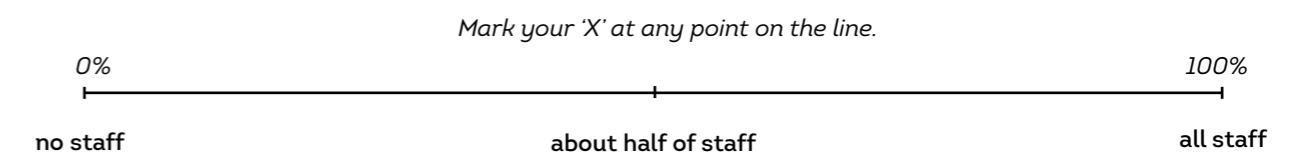

#### c) How many **HOSPITAL VISITORS** do you think would agree with this statement?

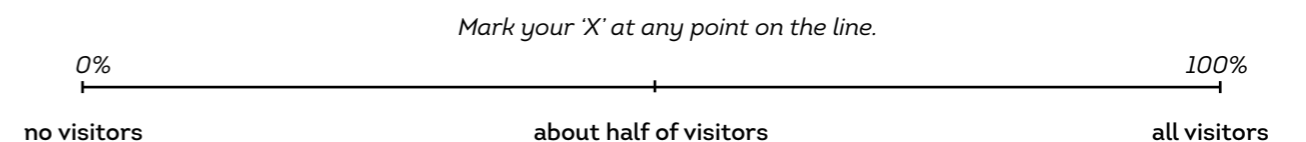

## SECTION 4: The behaviour of others in relation to smoking

These questions ask about what you think other people who come to Pinderfields Hospital do in relation to smoking and around the hospital grounds.

It doesn't matter if you really don't know the answer – it's just your best guess.

STATEMENT 3 **How many of these people do you think smoke in the entrances to Pinderfields Hospital?**

10 a) **HOSPITAL PATIENTS**

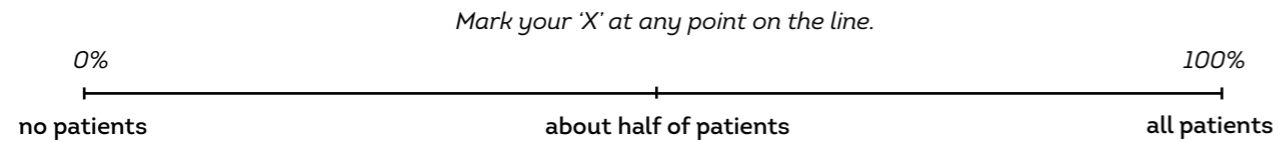

b) **HOSPITAL STAFF**

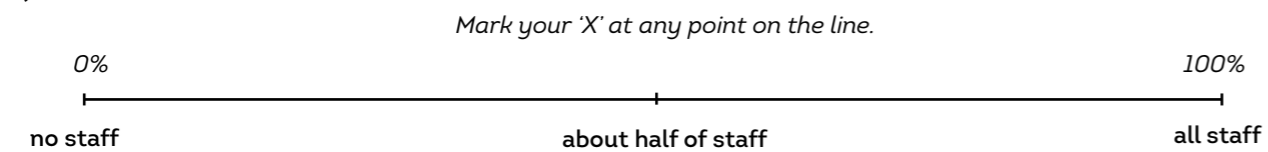

c) **HOSPITAL VISITORS**

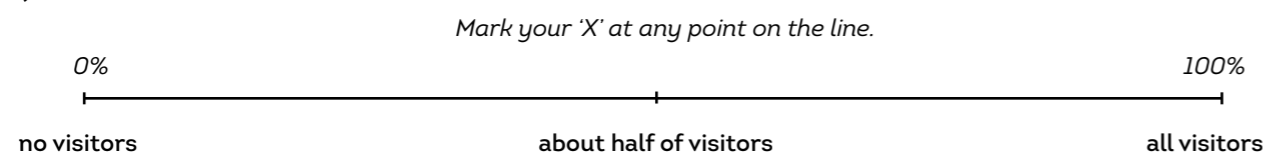

STATEMENT 4 **How many of these people do you think smoke on the grounds of Pinderfields Hospital?**

11 a) **HOSPITAL PATIENTS**

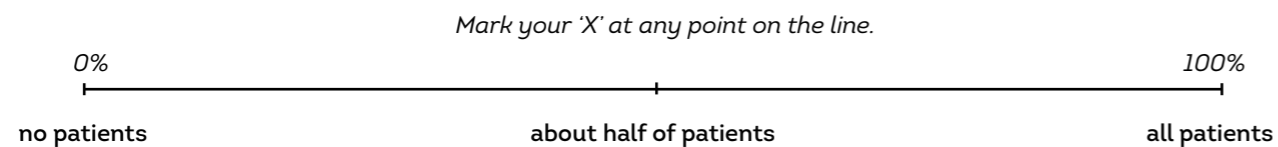

b) **HOSPITAL STAFF**

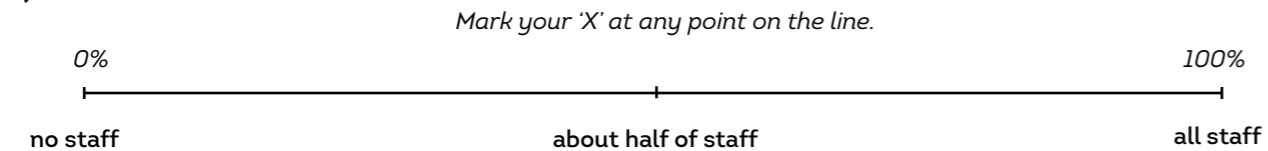

c) **HOSPITAL VISITORS**

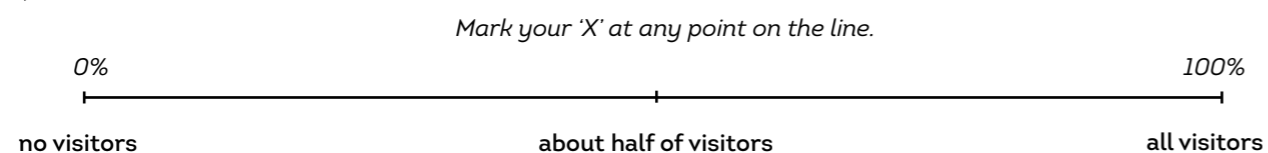

If you have any other comments you would like to add, please put them here.

**THANK YOU FOR COMPLETING THIS SURVEY**

**ALL THE INFORMATION WILL BE KEPT CONFIDENTIAL**

**PLEASE GIVE IT BACK TO THE PERSON WHO GAVE IT TO YOU  
or put it in the envelope provided and return it to:**

**Pinderfields General Office  
(open Monday to Friday 9am - 5pm).**

**Or hand into a member of staff at  
the reception desk.**
